# Supplementary material for: The importance of nerve microenvironment for schwannoma development
Source: Springer Nature journal article supplement (doi:10.1007/s00401-016-1583-8), 2016-05-28

# 1 Mouse lines used in this study

| Mouse line                          | Description                                              |
|-------------------------------------|----------------------------------------------------------|
| WT                                  | Wildtype animals                                         |
| P0-Cre;Nf2 <sup>fl/+</sup>          | Heterozygous loss of merlin in Schwann cells             |
| P0-Cre;Nf2 <sup>fl/fl</sup>         | Homozygous loss of merlin in Schwann cells               |
| Nefh-Cre;Nf2 <sup>fl/+</sup>        | Heterozygous loss of merlin in neurons                   |
| Nefh-Cre;Nf2 <sup>fl/fl</sup>       | Homozygous loss of merlin in neurons                     |
| P0-Cre;Nefh-Cre;Nf2 <sup>fl/+</sup> | Heterozygous loss of merlin in Schwann cells and neurons |

# 2

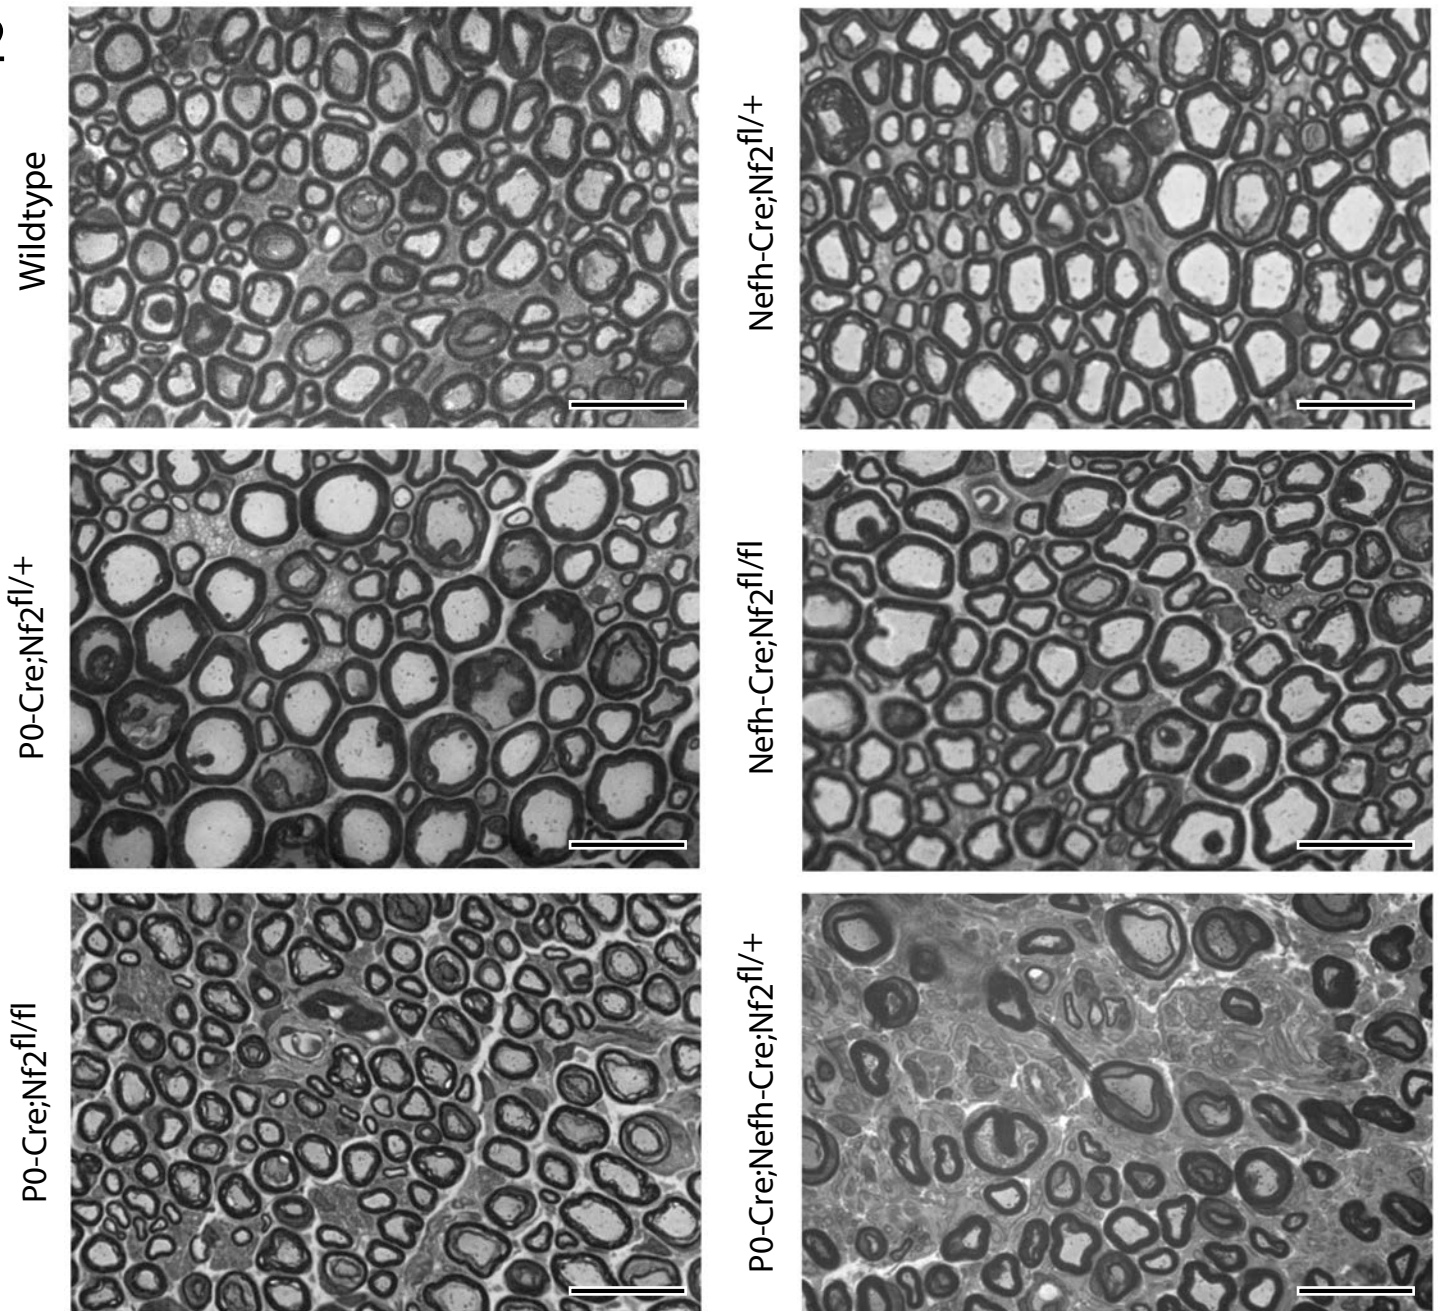

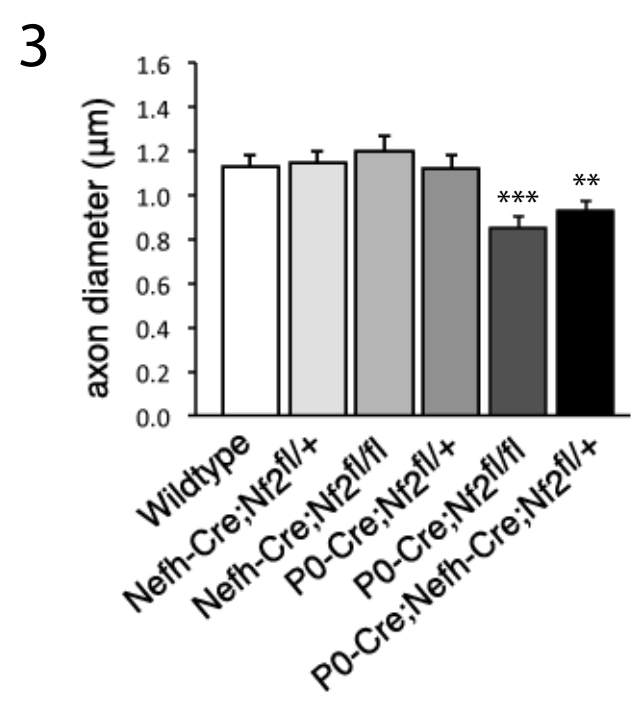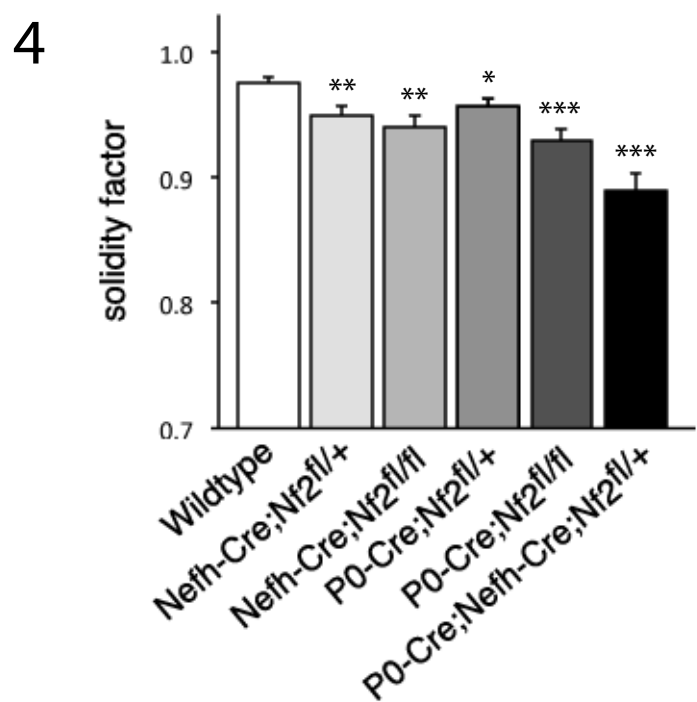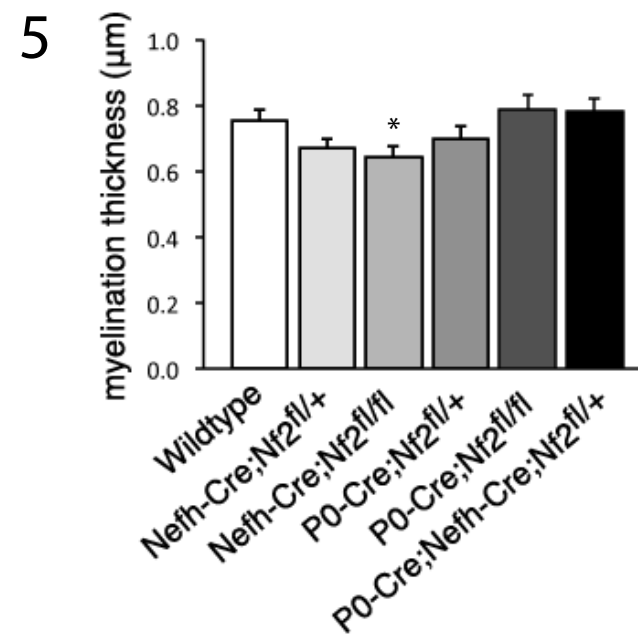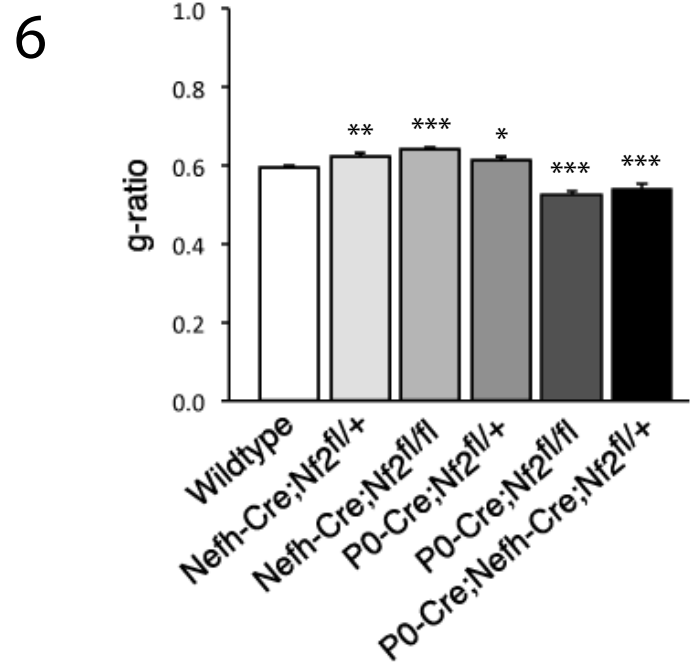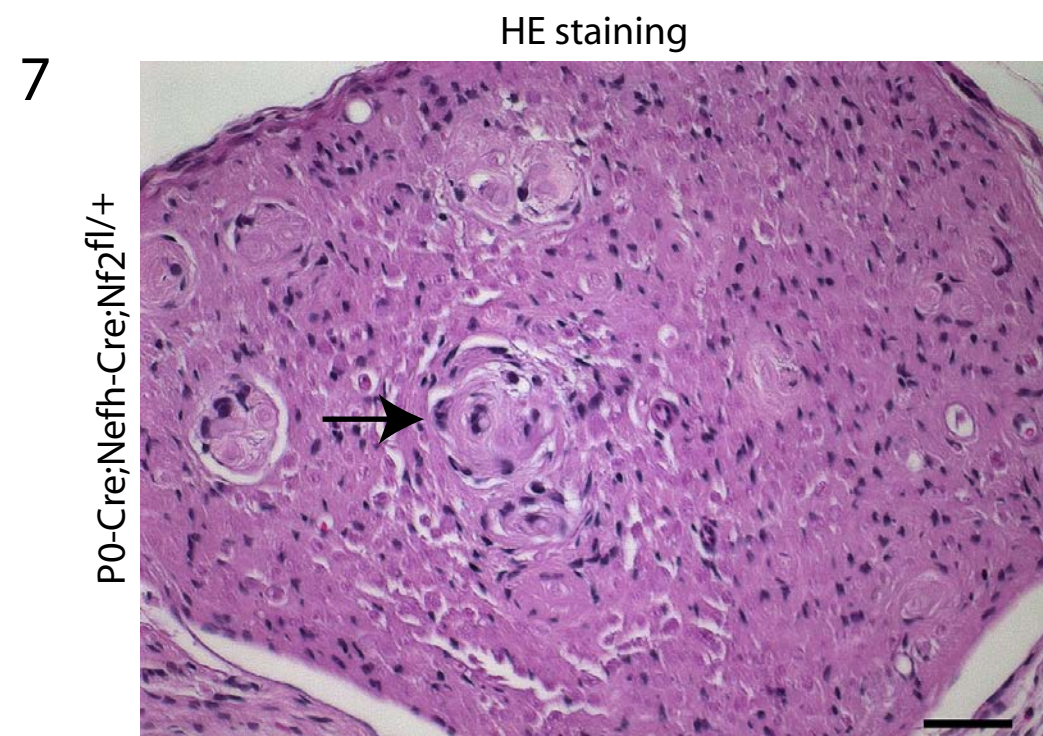

Wildtype

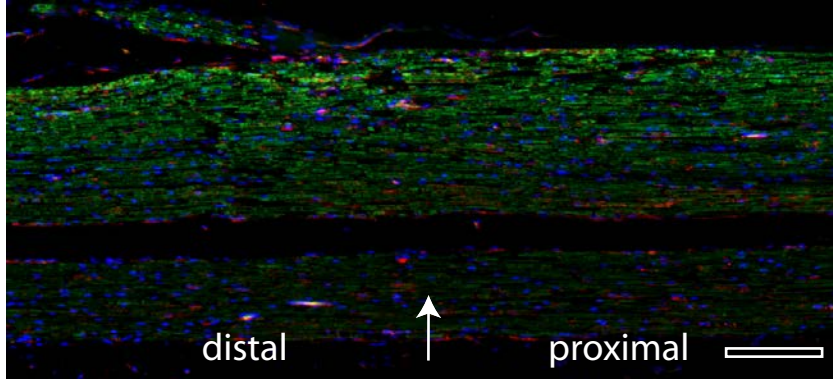

P0-Cre;Nf2<sup>fl/fl</sup>

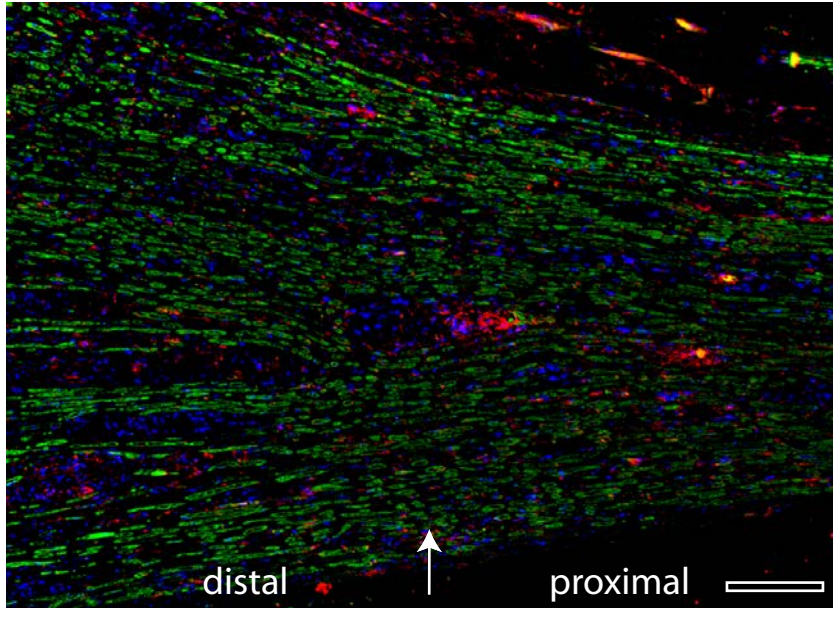

P0-Cre;Nefh-Cre;Nf2<sup>fl/fl</sup>/+

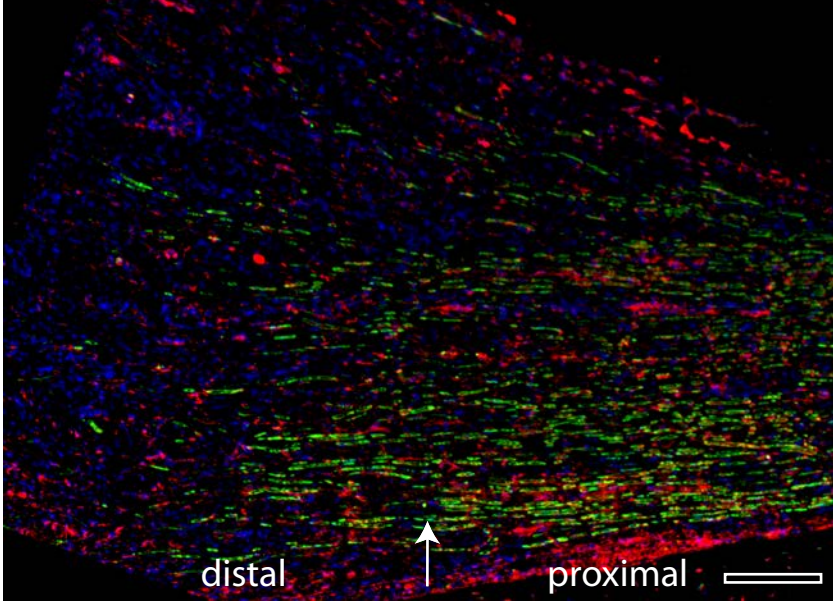

9

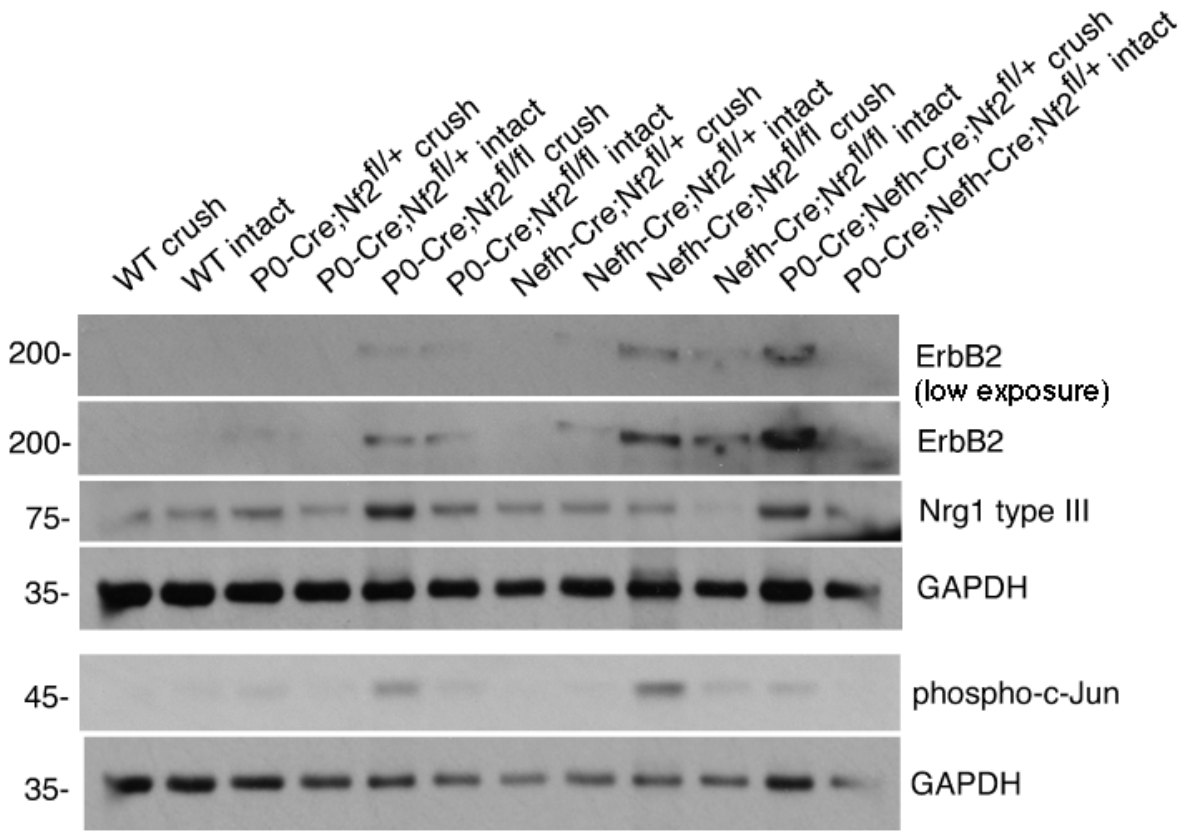

10

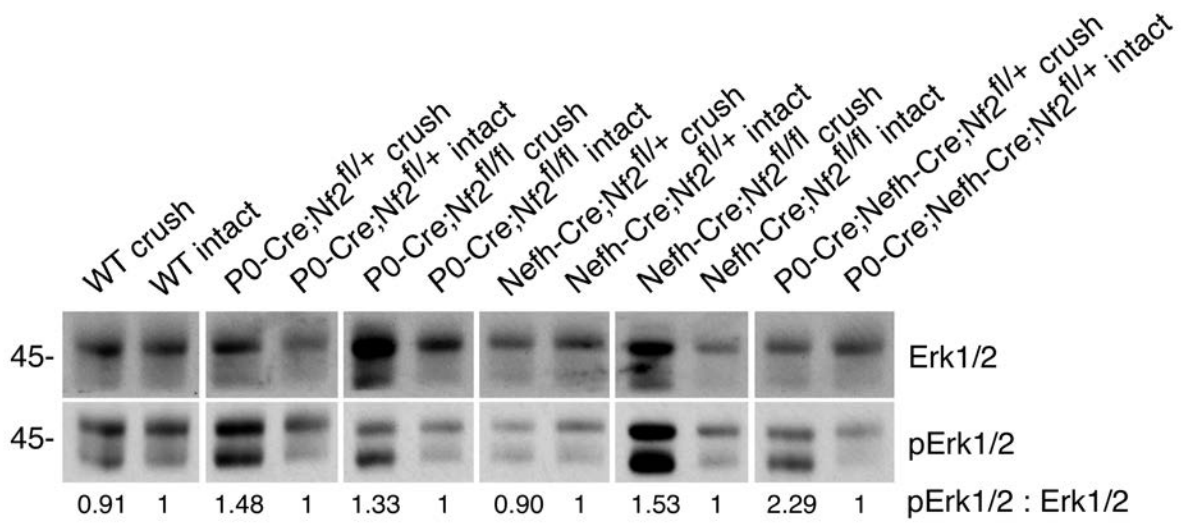

11

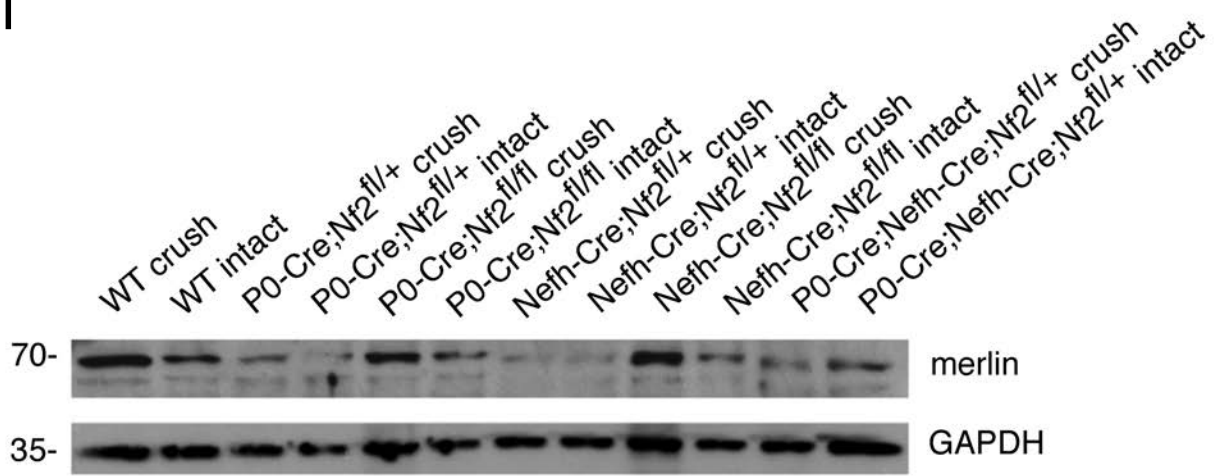

12

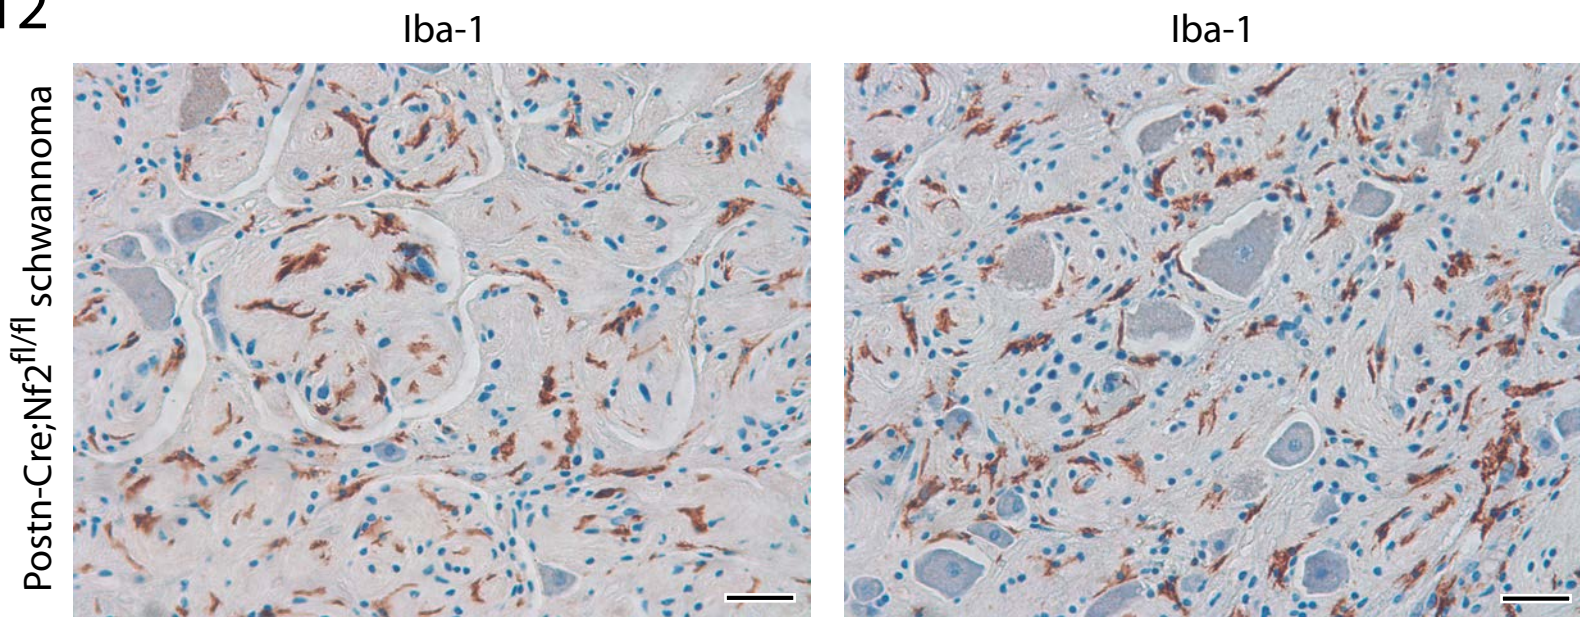

13

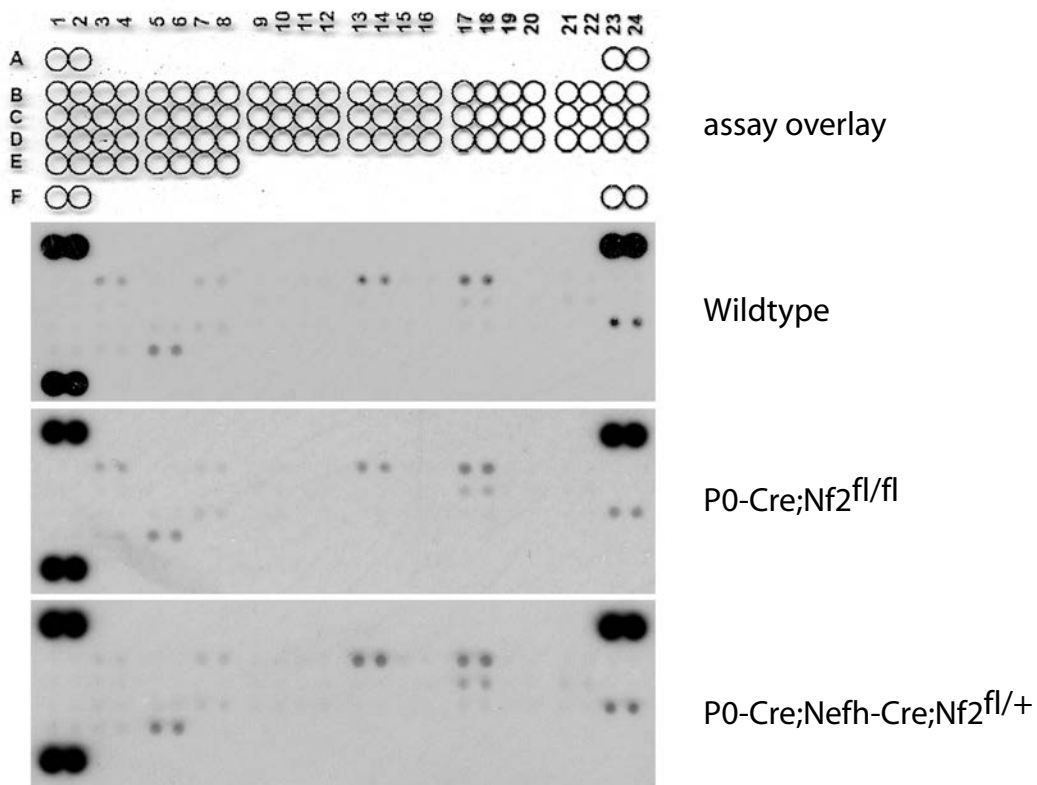

P0-Cre;Nefh-Cre;Nf2<sup>fl/+</sup>

vehicle

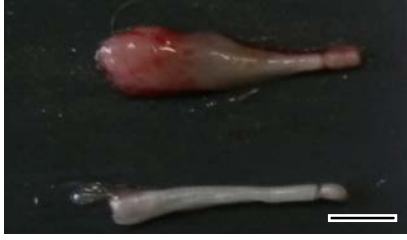

aspirin

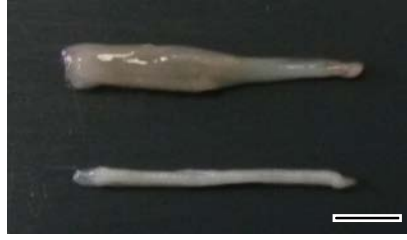

Supplement: MOESM1 [file 10208014]
